# Supplementary material for: Polar NiFe layered double hydroxide nanosheets for enhancing the performance of lithium–sulfur batteries
Source: Royal Society of Chemistry journal article supplement (doi:10.1039/d1qm00210d), 2021-01-01
Supplement: d1qm00210d1.pdf [file d1qm00210d1.pdf]

## Supporting information

### **Polar NiFe Layered Double Hydroxides Nanosheets for Enhancing the Performance of Lithium-Sulfur Batteries**

Lujing Liu<sup>a,c#</sup>, Kai Meng<sup>a,b#</sup>, Zhijun Jia<sup>a,\*</sup>, Yi Wang<sup>a,\*</sup>, Tao Qi<sup>a,\*</sup>

*<sup>a</sup>National Engineering Laboratory for Hydrometallurgical Cleaner Production Technology, Institute of Process Engineering, Chinese Academy of Sciences, Beijing 100190, China*

*<sup>b</sup>University of Chinese Academy of Sciences, Beijing 100049, China*

*<sup>c</sup>National Science Library, Chinese Academy of Sciences, Beijing 100190, China*

*#These authors contributed equally.*

*\*Corresponding Authors: Y. Wang, Fax: (+86) 10 82544848-802, Tel: (+86) 10 82544967, E-mail: [wangyi@ipe.ac.cn](mailto:wangyi@ipe.ac.cn) ; Z. Jia, E-mail: [zjjia@ipe.ac.cn](mailto:zjjia@ipe.ac.cn) ; T. Qi, E-mail: [tqi@ipe.ac.cn](mailto:tqi@ipe.ac.cn)*

Supplementary figures

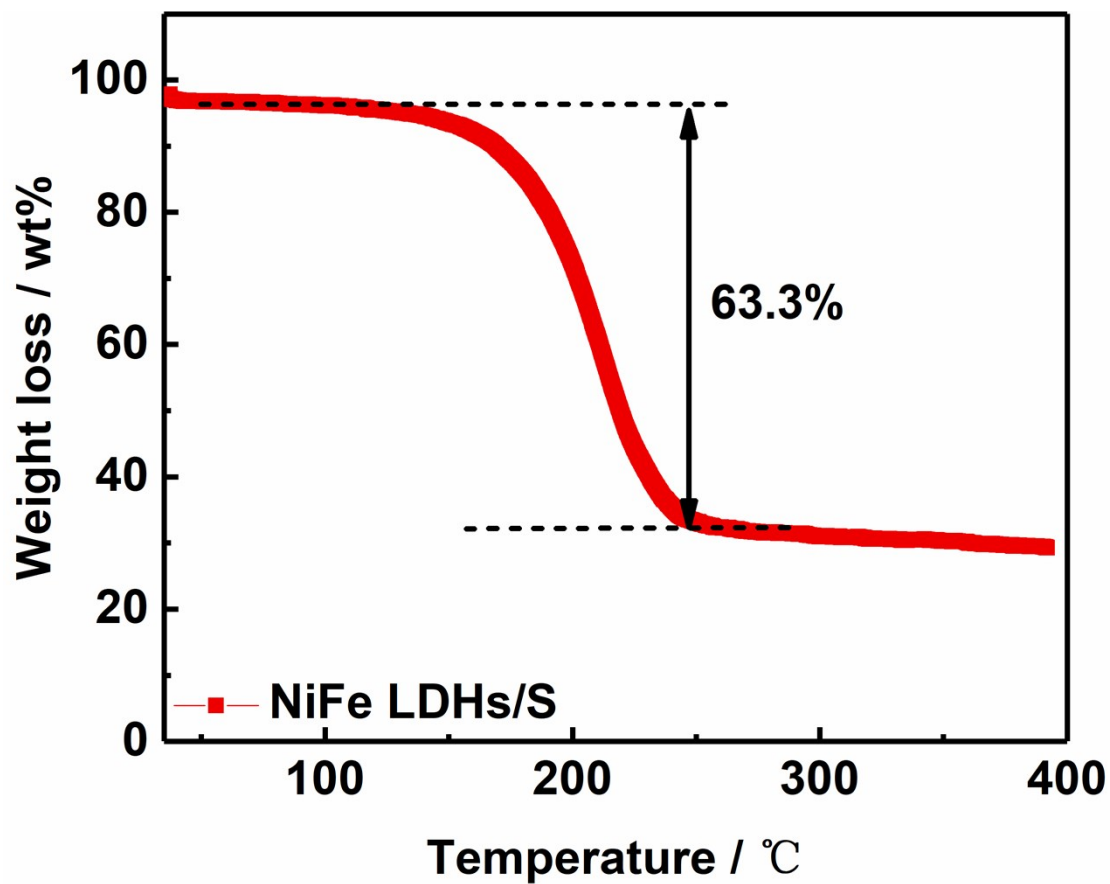

Figure S1. Thermogravimetric analysis of NiFe LDHs/S.

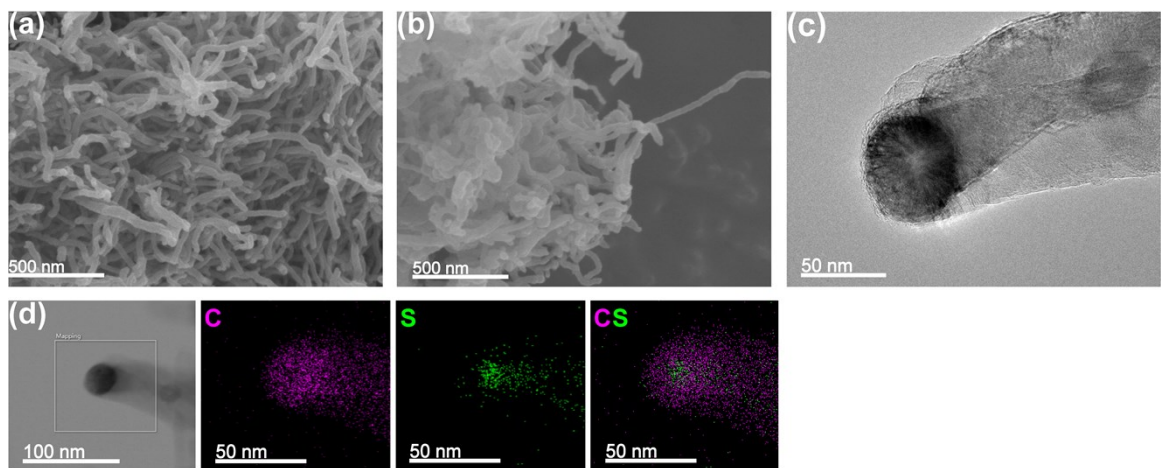

Figure S2. SEM images of (a) CNTs and (b) CNTs/S. (c) TEM image of CNTs/S and (d) corresponding EDS mapping images.

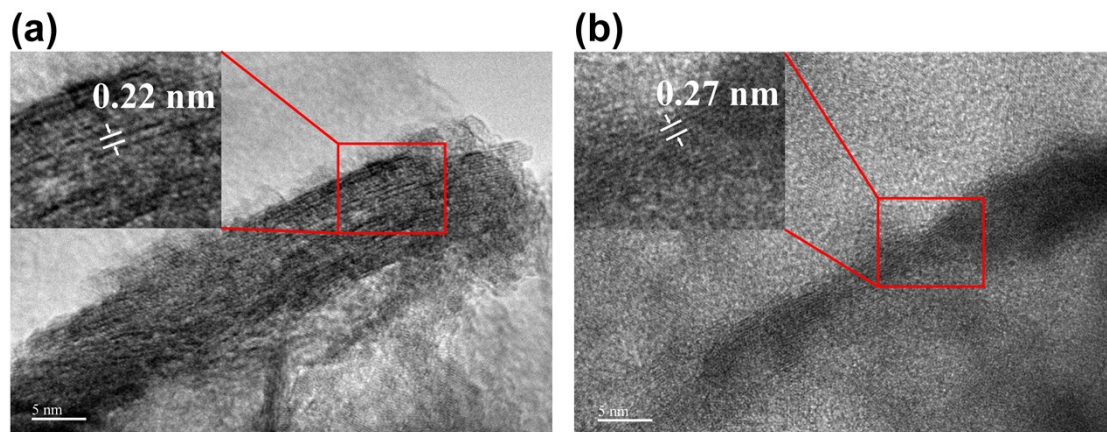

Figure S3. TEM images of (a) the layer of NiFe LDHs and (b) the layer of NiFe LDHs/S.

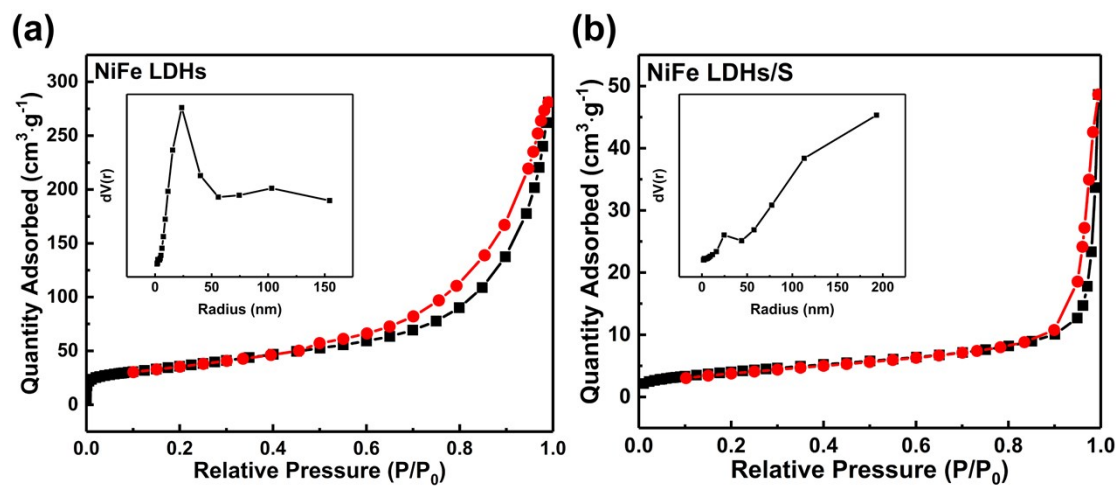

Figure S4. Nitrogen adsorption/desorption isotherms and pore size distribution (insets) of (a) NiFe LDHs and (b) NiFe LDHs/S.

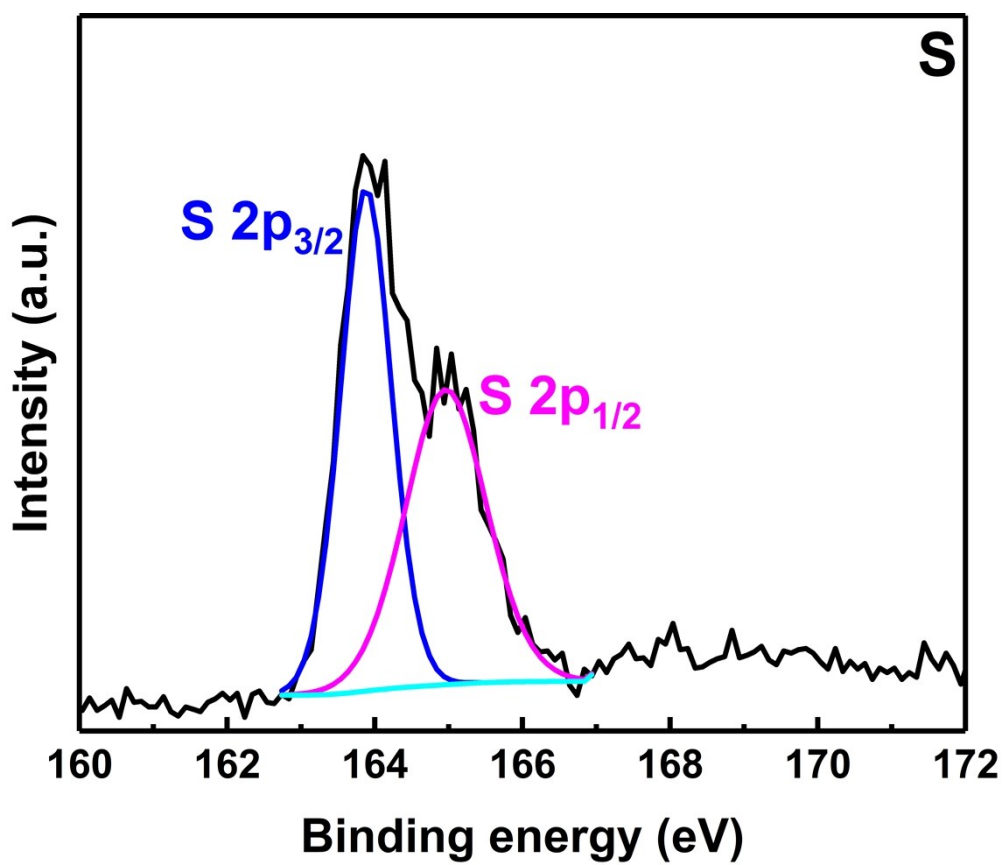

Figure S5. High-resolution XPS spectrum of S 2p for pure sulfur.

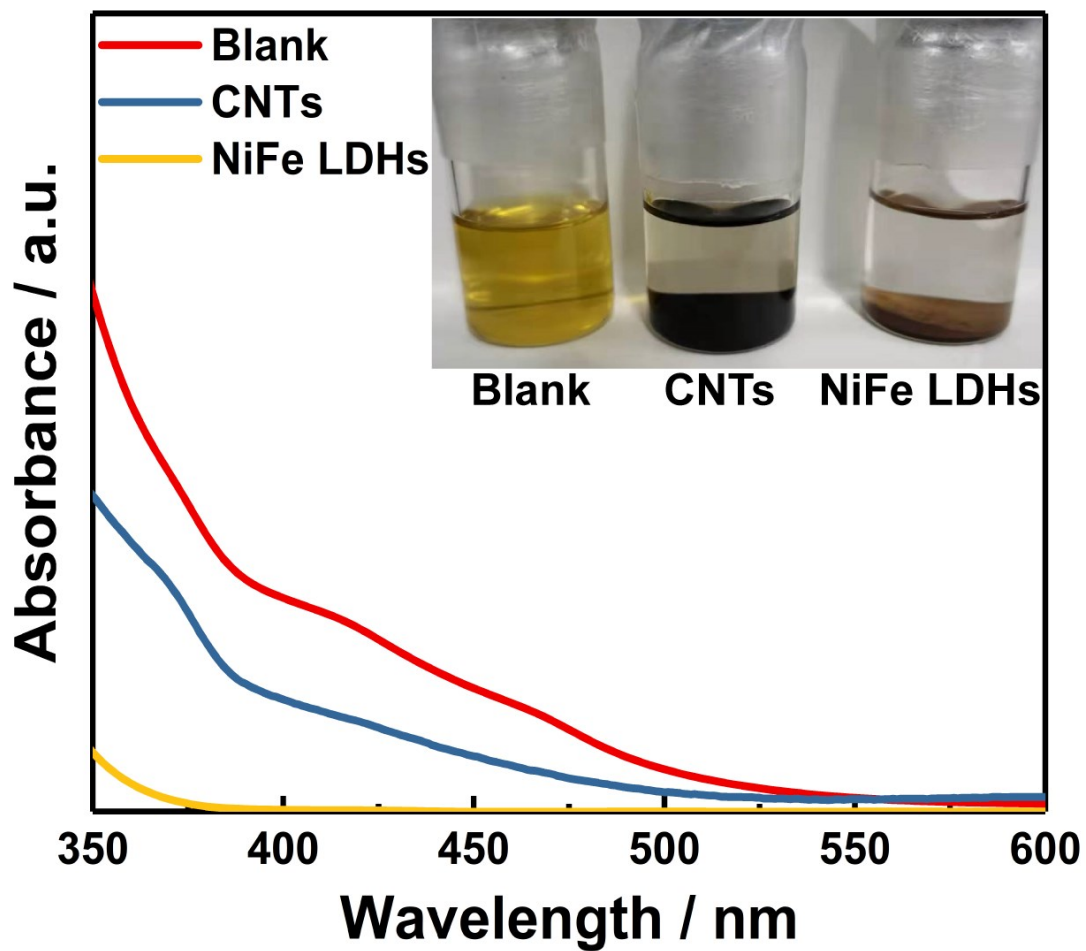

Figure S6. UV-vis absorption spectra and visual images (inset) of polysulfide solution before and after the addition of CNTs or NiFe LDHs.

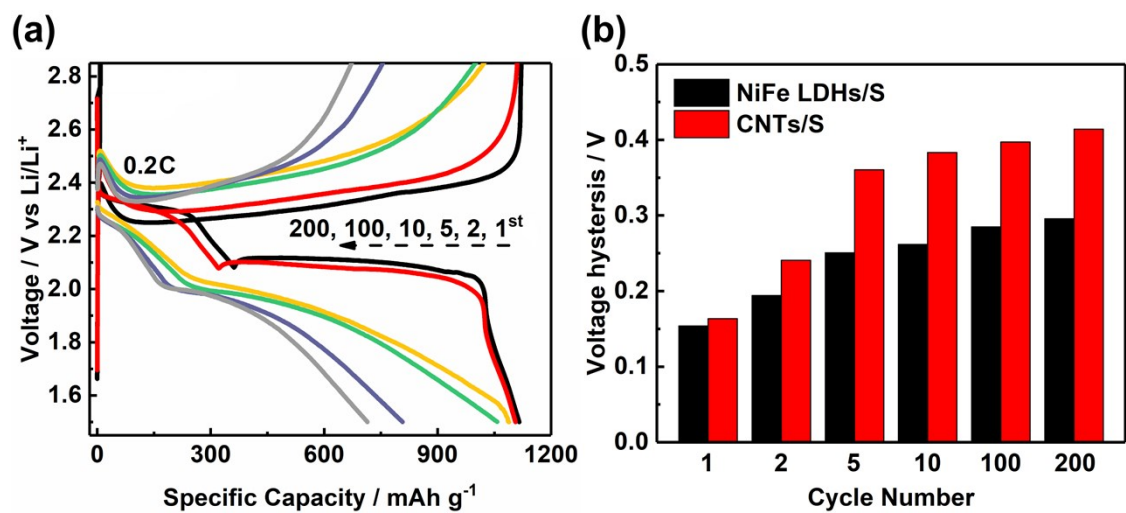

Figure S7. (a) Charge/discharge curves of CNTs/S at 0.2 C. (b) Voltage hysteresis of the NiFe LDHs/S and CNTs/S electrodes at various cycles.



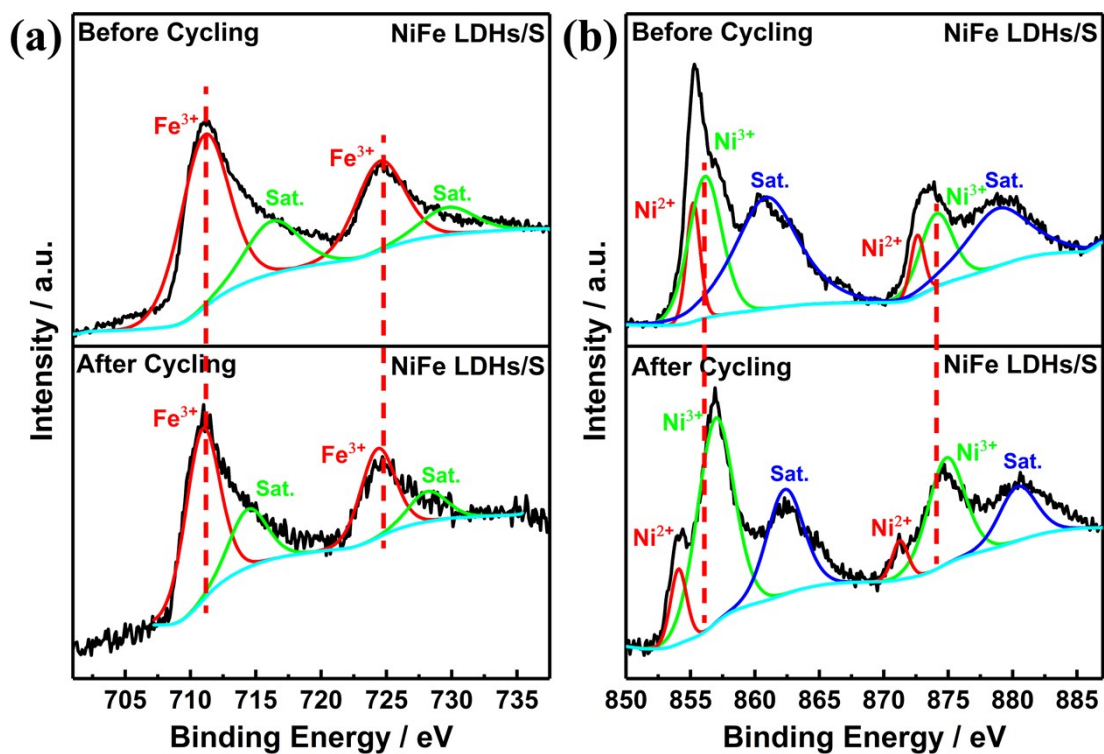

Figure S8. High-resolution XPS spectra of (a) Ni 2p and (b) Fe 2p for NiFe LDHs/S before and after 400 cycles at a rate of 0.2 C.

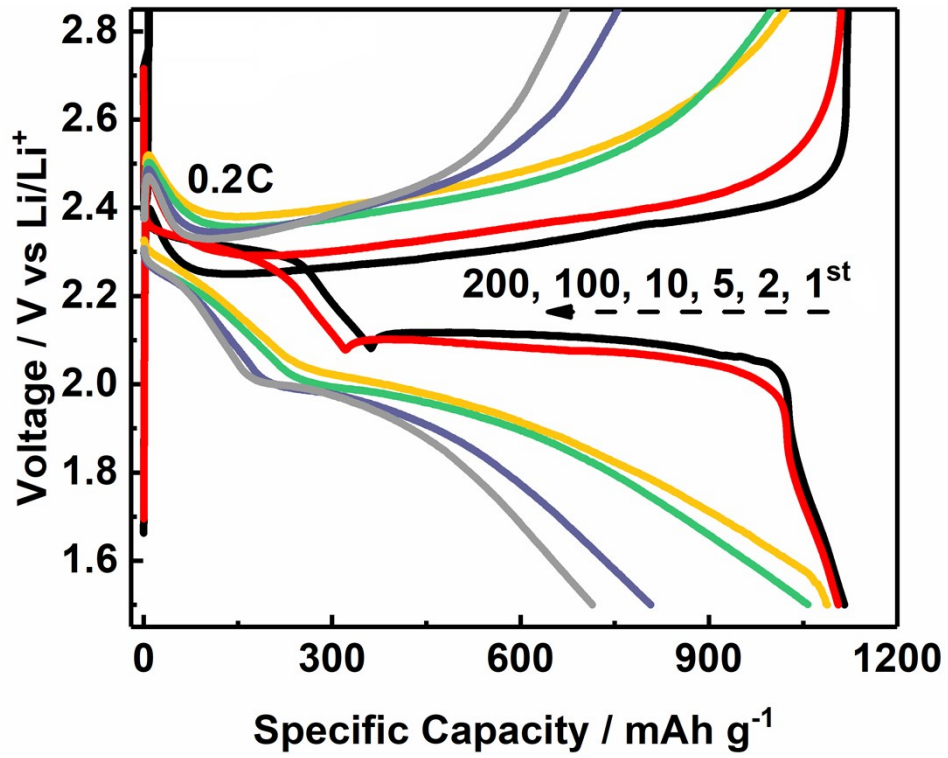

Figure S9. (a) Cycle performance comparison among NiFe LDHs/S, NiFe LDHs-20%/S and NiFe LDHs-40%/S.

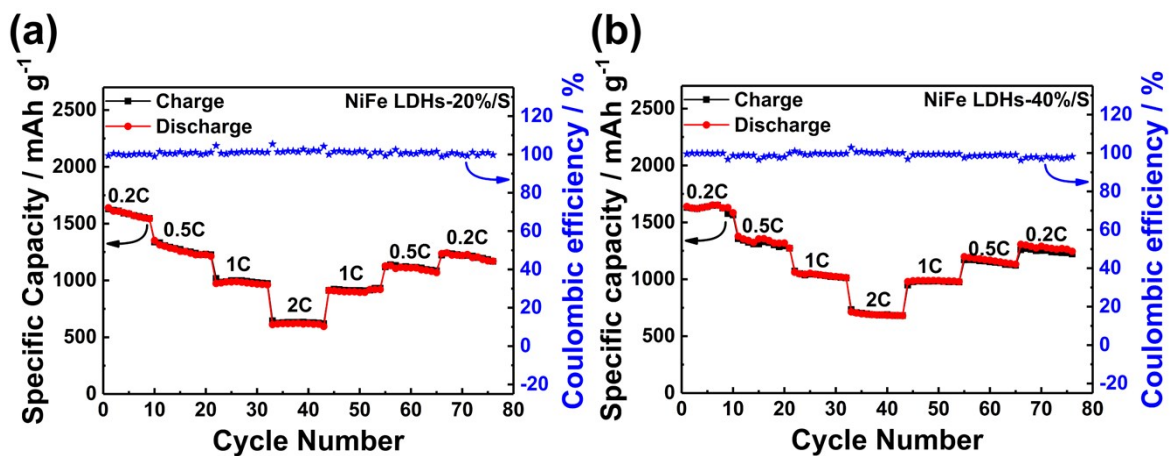

Figure S10. Rate capabilities of (a) NiFe LDHs-20%/S and (b) NiFe LDHs-40%/S at various current densities from 0.2 to 2.0 C.

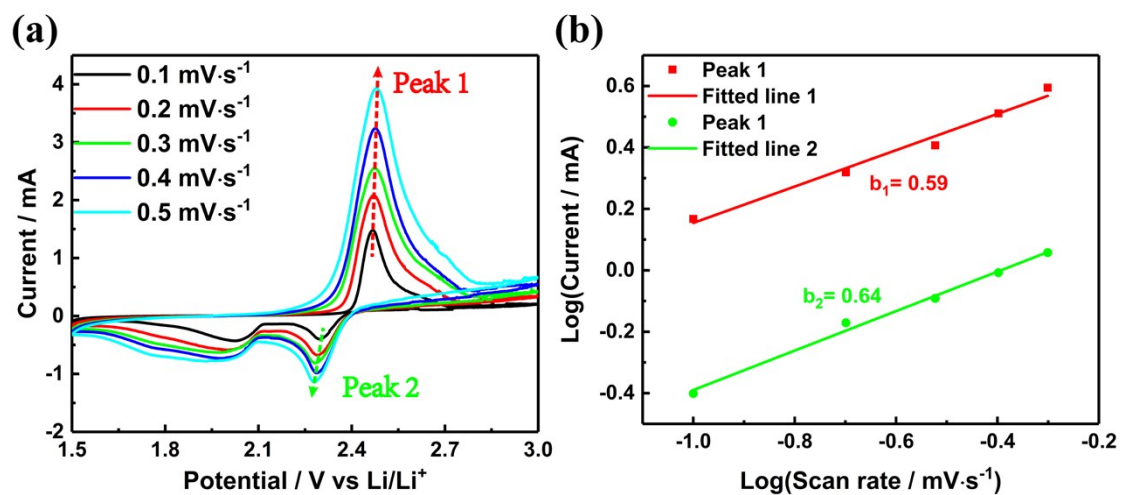

Figure S11. (a) CV curves of NiFe LDHs/S cathode at different scan rates and (b) fitted lines of log (peak current) and log (scan rate).

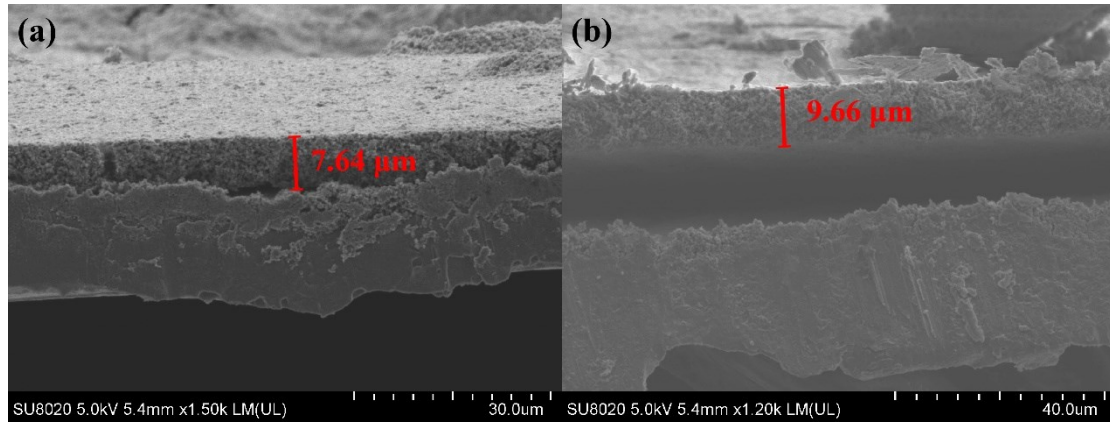

Figure S12. SEM images of typical side-views of NiFe LDHs/S cathode in Li-S cells (a) before and (b) after 1000 cycles.

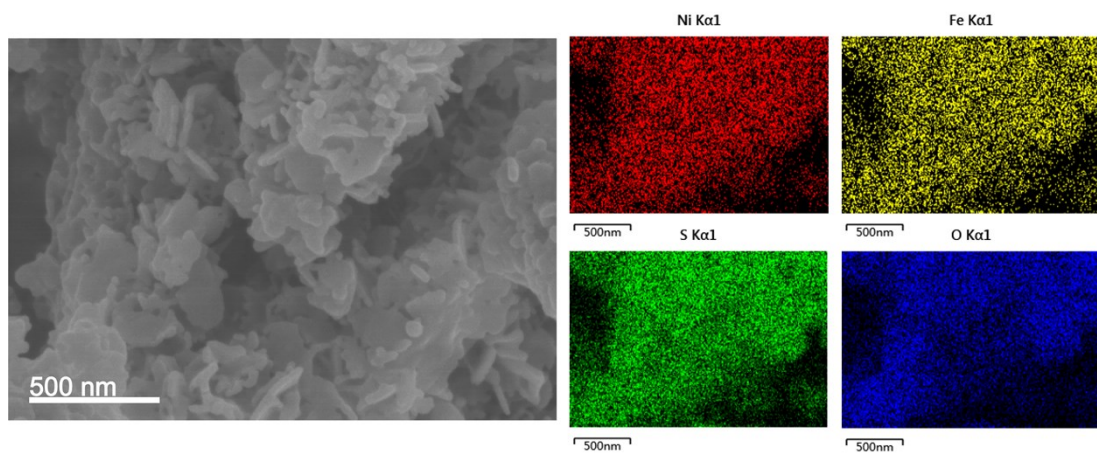

Figure S13. SEM image and EDS mapping images of NiFe LDHs/S after 1000 cycles.

---

## Supplementary table

Table S1. Comparison of the electrochemical performance of NiFe LDHs/S at 0.2 C with that of other reported state-of-the-art cathode materials.

| Cathode materials                  | Initial capacity<br>(mAh g <sup>-1</sup> ) | Cycles     | Capacity<br>after cycles | Capacity decay<br>(% per cycle) | Ref.             |
|------------------------------------|--------------------------------------------|------------|--------------------------|---------------------------------|------------------|
| <b>NiFe LDHs/S</b>                 | <b>1633.5</b>                              | <b>400</b> | <b>1103</b>              | <b>0.08</b>                     | <b>This work</b> |
| <b>CNTs/S</b>                      | <b>1115.8</b>                              | <b>400</b> | <b>640</b>               | <b>0.11</b>                     | <b>This work</b> |
| 3D GF-rGO/S                        | 1000                                       | 350        | 638                      | 0.1                             | 1                |
| Li <sub>2</sub> S@TiS <sub>2</sub> | 806                                        | 150        | 693                      | 0.09                            | 2                |
| MWCNT@S                            | 1035                                       | 100        | 602                      | 0.42                            | 3                |
| GS-MWCNT@S                         | 1396                                       | 100        | 844                      | 0.40                            | 3                |
| S/ZIF-8-NS-C                       | 1226                                       | 100        | 800                      | 0.34                            | 4                |
| VO <sub>2</sub> -rGO/S             | 1180                                       | 200        | 896                      | 0.12                            | 5                |
| rGO/S                              | 985                                        | 200        | 493                      | 0.25                            | 5                |
| S/rGO-La(OH) <sub>3</sub>          | 861                                        | 50         | 574                      | 0.67                            | 6                |
| TMTD-S                             | 685                                        | 200        | 540                      | 0.11                            | 7                |
| C@NiSe <sub>2</sub> /S             | 1250                                       | 200        | 1025                     | 0.34                            | 8                |
| S@NiCo-DH@RC                       | 1132.3                                     | 250        | 971.9                    | 0.14                            | 9                |
| S@Ni/Fe LDH                        | 1091                                       | 200        | 724.5                    | 0.17                            | 10               |

---

Table S2. Comparison of the electrochemical performance of NiFe LDHs/S at 2 C with that of other reported state-of-the-art cathode materials.

| Cathode materials                           | Initial capacity<br>(mAh g <sup>-1</sup> ) | cycles      | Capacity<br>after cycles | Capacity decay<br>(% per cycle) | Ref.             |
|---------------------------------------------|--------------------------------------------|-------------|--------------------------|---------------------------------|------------------|
| <b>NiFe LDHs/S</b>                          | <b>836.1</b>                               | <b>1000</b> | <b>631.6</b>             | <b>0.024</b>                    | <b>This work</b> |
| MWCNT@S                                     | 1035                                       | 100         | 602                      | 0.42                            | 3                |
| GS-MWCNT@S                                  | 1396                                       | 100         | 844                      | 0.40                            | 3                |
| S@NiCo-DH@RC                                | 871.5                                      | 1500        | 675.6                    | 0.015                           | 9                |
| S@GFS-15                                    | 891.7                                      | 1000        | 396.8                    | 0.037                           | 11               |
| C@WS <sub>2</sub> /S                        | 563                                        | 1500        | 502                      | 0.00072                         | 12               |
| N-Co <sub>3</sub> O <sub>4</sub> @N-C/rGO-S | ~900                                       | 1000        | 611                      | 0.032                           | 13               |
| GA-DR-MoS <sub>2</sub> /S                   | 762                                        | 500         | 609.6                    | 0.042                           | 14               |
| CP(S-PMAT)/C                                | 739                                        | 1000        | 495                      | 0.040                           | 15               |
| CC@CoP/C-S                                  | 923                                        | 600         | 833                      | 0.016                           | 16               |
| MCM/Nb <sub>2</sub> O <sub>5</sub> /S       | ~1200                                      | 500         | 650                      | 0.092                           | 17               |
| SiO <sub>2</sub> @HC/S                      | 776                                        | 400         | 603                      | 0.056                           | 18               |



## Evaluation of the lithium ions diffusion coefficients

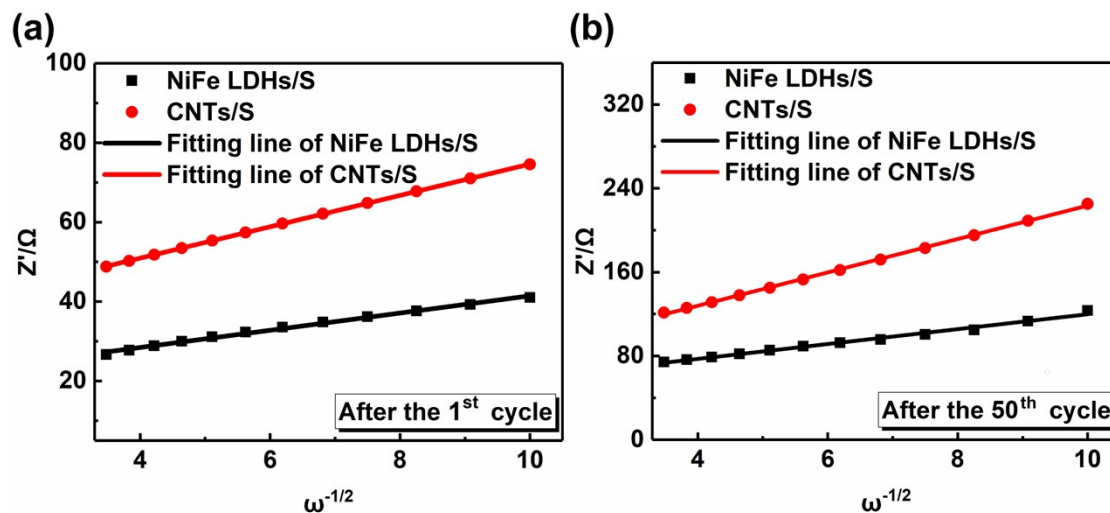

Figure S14. Variations and fittings between  $Z'$  and  $\omega^{-1/2}$  in the low frequency region after (a) the 1<sup>st</sup> and (b) the 50<sup>th</sup> cycles.

In order to evaluate the lithium ions diffusion coefficients ( $D$ ), the linear relations between  $Z'$  and  $\omega^{-1/2}$  for NiFe LDHs/S and CNTs/S electrodes were fitted in Figure S14(a) and S14(b), respectively. The  $\text{Li}^+$  diffusion coefficient ( $D$ ) can be calculated through the following equation<sup>19</sup>:

$$[1]$$

For the calculation of  $D$ , the value of  $\sigma$  needs to be identified. Considering the proportional relationship between  $Z'$  and  $\omega^{-1/2}$  ( $Z' \propto \sigma\omega^{-1/2}$ , as shown in Figure S11), the value of  $\sigma$  can be obtained by the linear fitting of  $Z'$  and  $\omega^{-1/2}$  and the results are shown in Table I. According to the equation [1], the order of  $D$  is NiFe LDHs/S (after the 1<sup>st</sup> cycle) > CNTs/S (after the 1<sup>st</sup> cycle) > NiFe LDHs/S (after the 50<sup>th</sup> cycle) > CNTs/S (after the 50<sup>th</sup> cycle).

---

## References

1. G. Hu, C. Xu, Z. Sun, S. Wang, H.-M. Cheng, F. Li and W. Ren, *Adv. Mater.*, 2016, **28**, 1603-1609.
2. Z. W. Seh, J. H. Yu, W. Li, P.-C. Hsu, H. Wang, Y. Sun, H. Yao, Q. Zhang and Y. Cui, *Nature Commun.*, 2014, **5**, 5017.
3. R. Chen, T. Zhao, J. Lu, F. Wu, L. Li, J. Chen, G. Tan, Y. Ye and K. Amine, *Nano Lett.*, 2013, **13**, 4642-4649.
4. Q. Wu, X. Zhou, J. Xu, F. Cao and C. Li, *J. Energy Chem.*, 2019, **38**, 94-113.
5. J. Xu, T. Li, W. Zhang, W. Wu, Y. Jin, X. Zhang, D. Su and G. Wang, *J. Alloys Compd.*, 2019, **804**, 549-553.
6. Y. Tian, Y. Zhao, Y. Zhang, L. Ricardez-Sandoval, X. Wang and J. Li, *ACS Appl. Mater. Interfaces*, 2019, **11**, 23271-23279.
7. H. Xu, Y. Shi, S. Yang and B. Li, *J. Power Sources*, 2019, **430**, 210-217.
8. M. X. Wang, L. S. Fan, X. Wu, Y. Qiu, B. Guan, Y. Wang, N. Q. Zhang and K. N. Sun, *J. Mater. Chem. A.*, 2019, **7**, 15302-15308.
9. L. Zhang, Z. X. Chen, N. C. Dongfang, M. X. Li, C. Z. Diao, Q. S. Wu, X. Chi, P. L. Jiang, Z. D. Zhao, L. Dong, R. C. Che, K. P. Loh and H. B. Lu, *Adv. Energy Mater.*, 2018, **8**, 12.
10. J. Zhang, Z. Li, Y. Chen, S. Gao and X. W. Lou, *Angew. Chem., Int. Ed.*, 2018, **57**, 10944-10948.
11. H. Zhang, Q. Gao, X. Tian, Z. Li, P. Xu and H. Xiao, *Electrochim. Acta*, 2019, **319**, 472-480.
12. T. Lei, W. Chen, J. Huang, C. Yan, H. Sun, C. Wang, W. Zhang, Y. Li and J. Xiong, *Adv. Energy Mater.*, 2017, **7**.
13. J. Xu, W. Zhang, Y. Chen, H. Fan, D. Su and G. Wang, *J. Mater. Chem. A.*, 2018, **6**, 2797-2807.
14. M. Liu, C. Zhang, J. Su, X. Chen, T. Ma, T. Huang and A. Yu, *ACS Appl. Mater. Interfaces*, 2019, **11**, 20788-20795.
15. S. Zeng, L. Li, L. Xie, D. Zhao, N. Wang and S. Chen, *ChemSusChem*, 2017, **10**, 3378-3386.
16. Z. Wang, J. Shen, J. Liu, X. Xu, Z. Liu, R. Hu, L. Yang, Y. Feng, J. Liu, Z. Shi, L. Ouyang, Y. Yu and M. Zhu, *Adv. Mater.*, 2019, **31**, 1902228.
17. Y. Tao, Y. Wei, Y. Liu, J. Wang, W. Qiao, L. Ling and D. Long, *Energy Environ. Sci.*, 2016, **9**, 3230-3239.
18. R. Wang, K. Wang, S. Gao, M. Jiang, M. Zhou, S. Cheng and K. Jiang, *Nanoscale*, 2017, **9**, 14881-14887.
19. M. He, L. Yuan, W. Zhang, X. Hu and Y. Huang, *J. Phys. Chem. C*, 2011, **31**, 15703-15709.
